# Supplementary material
Source: Royal Society of Chemistry journal article supplement (doi:10.1039/d6cp01199c)
Supplement: d6cp01199c1.pdf [file d6cp01199c1.pdf]

## Supplementary Information

### Ability of Carbenes to Act as Lewis Base within a Halogen Bond

Steve Scheiner

Department of Chemistry and Biochemistry  
Utah State University  
Logan, Utah 84322-0300  
USA

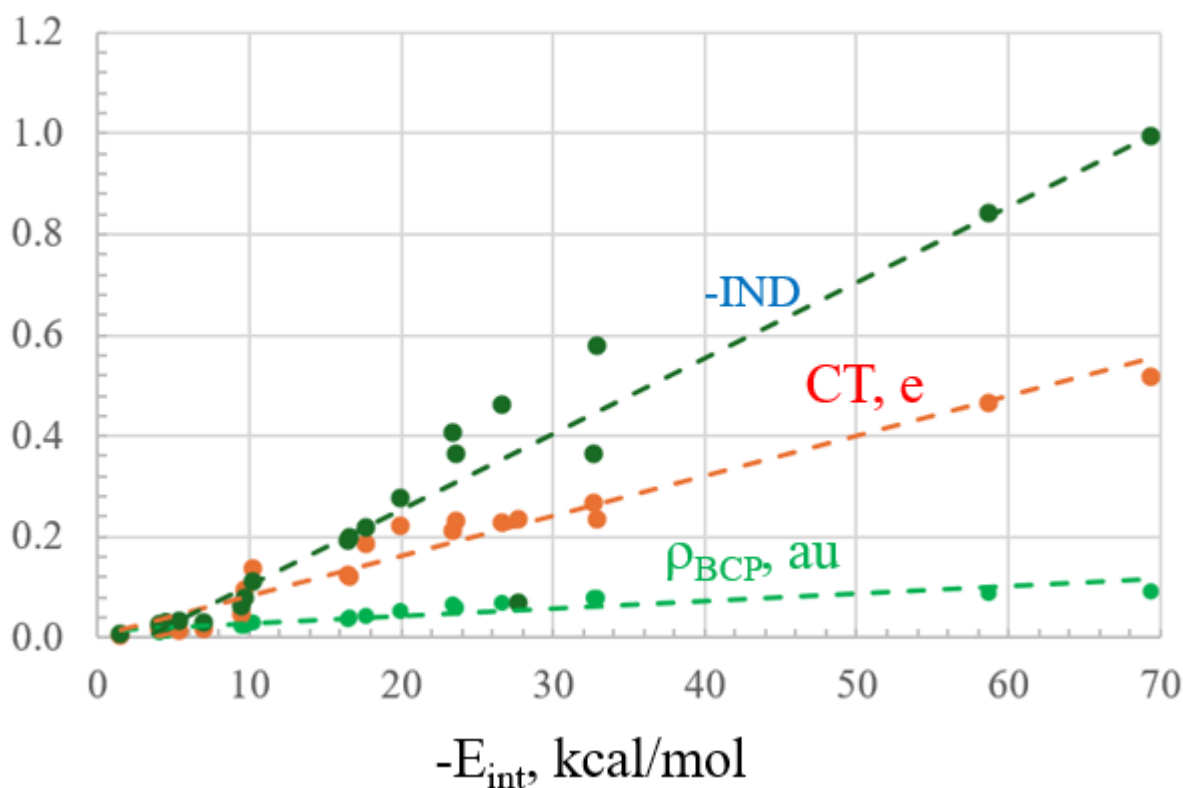

Fig S1. Correlations of the interaction energy with various properties. Induction energy IND in units of 100 kcal/mol so as to fit onto the same plot as charge transfer and bond critical point electron density.

Table S1. SAPT0 components (kcal/mol) of triplet complexes with ICN, including the percentage contribution of each to the total attractive energy (ES+IND+DISP).

|                                                        | ES     | IND    | DISP   | EX    | %ES  | %IND | %DISP |
|--------------------------------------------------------|--------|--------|--------|-------|------|------|-------|
| C(NH <sub>2</sub> ) <sub>2</sub>                       | -12.75 | -7.81  | -6.69  | 20.23 | 46.8 | 28.7 | 24.5  |
| C(C <sub>2</sub> H <sub>5</sub> ) <sub>2</sub>         | -6.30  | -2.91  | -6.32  | 11.02 | 40.5 | 18.7 | 40.7  |
| C(C <sub>6</sub> H <sub>11</sub> ) <sub>2</sub>        | -5.22  | -3.10  | -7.63  | 9.48  | 32.7 | 19.4 | 47.8  |
| C(CH=CH <sub>2</sub> ) <sub>2</sub>                    | -4.86  | -2.76  | -5.78  | 8.87  | 36.3 | 20.6 | 43.1  |
| ring-C(C(CH <sub>2</sub> ) <sub>2</sub> ) <sub>2</sub> | -4.99  | -3.11  | -5.86  | 8.87  | 35.7 | 22.3 | 42.0  |
| C(CH=CH=CH=CH <sub>2</sub> ) <sub>2</sub>              | -4.67  | -2.64  | -6.59  | 8.34  | 33.6 | 19.0 | 47.4  |
| C(C <sub>6</sub> H <sub>5</sub> ) <sub>2</sub>         | -8.77  | -4.93  | -7.95  | 14.29 | 40.5 | 22.8 | 36.7  |
| C(NH <sub>3</sub> ) <sub>2</sub>                       | -38.12 | -22.58 | -11.91 | 51.64 | 52.5 | 31.1 | 16.4  |

Table S2. Interaction energy (kcal/mol) of Lewis base with ICN calculated at M06-2X and CCSD(T) levels.

|                                                        | M06-2X | CCSD(T) |
|--------------------------------------------------------|--------|---------|
| C(NH <sub>2</sub> ) <sub>2</sub>                       | 19.99  | 17.51   |
| NHC                                                    | 17.64  | 15.85   |
| C(C <sub>2</sub> H <sub>5</sub> ) <sub>2</sub>         | 23.36  | 19.39   |
| C(CH=CH <sub>2</sub> ) <sub>2</sub>                    | 23.59  | 19.01   |
| ring-C(C(CH <sub>2</sub> ) <sub>2</sub> ) <sub>2</sub> | 27.67  | 23.99   |
| C(CH=CH=CH=CH <sub>2</sub> ) <sub>2</sub>              | 32.70  | 28.41   |
| C(C <sub>6</sub> H <sub>5</sub> ) <sub>2</sub>         | 26.62  | 23.68   |
| C(NH <sub>3</sub> ) <sub>2</sub>                       | 69.40  | 64.36   |
| C(PH <sub>3</sub> ) <sub>2</sub>                       | 16.48  | 14.20   |

Table S3. SAPT0 components (kcal/mol) of complexes with ICN, including the percentage contribution of each to the total attractive energy (ES+IND+DISP).

|                                                        | ES      | IND    | DISP   | EX     | %ES  | %IND | %DISP |
|--------------------------------------------------------|---------|--------|--------|--------|------|------|-------|
| prototype XB                                           |         |        |        |        |      |      |       |
| OH <sub>2</sub>                                        | -10.95  | -1.65  | -2.32  | 7.78   | 73.4 | 11.1 | 15.5  |
| NH <sub>3</sub>                                        | -18.40  | -2.61  | -3.40  | 14.40  | 75.4 | 10.7 | 13.9  |
| CH <sub>4</sub>                                        | -1.73   | -0.66  | -2.10  | 3.42   | 38.6 | 14.7 | 46.7  |
| H <sub>2</sub> C=CH <sub>2</sub>                       | -8.09   | -1.37  | -3.91  | 8.71   | 60.5 | 10.2 | 29.3  |
| HC≡CH                                                  | -6.91   | -1.22  | -3.34  | 7.39   | 60.2 | 10.7 | 29.1  |
| saturated R                                            |         |        |        |        |      |      |       |
| C(OH) <sub>2</sub> t                                   | -20.73  | -3.26  | -4.65  | 17.70  | 72.4 | 11.4 | 16.2  |
| C(OH) <sub>2</sub> c                                   | -27.28  | -3.69  | -5.59  | 26.13  | 74.6 | 10.1 | 15.3  |
| C(NH <sub>2</sub> ) <sub>2</sub>                       | -62.06  | -9.18  | -10.06 | 58.51  | 76.3 | 11.3 | 12.4  |
| NHC                                                    | -49.87  | -7.59  | -9.03  | 46.36  | 75.0 | 11.4 | 13.6  |
| C(C <sub>2</sub> H <sub>5</sub> ) <sub>2</sub>         | -85.22  | -13.97 | -15.36 | 87.88  | 74.4 | 12.2 | 13.4  |
| C(C <sub>6</sub> H <sub>11</sub> ) <sub>2</sub>        | -114.24 | -21.06 | -19.63 | 115.69 | 73.7 | 13.6 | 12.7  |
| unsaturated R                                          |         |        |        |        |      |      |       |
| C(CH=CH <sub>2</sub> ) <sub>2</sub>                    | -76.16  | -12.79 | -14.18 | 76.21  | 73.9 | 12.4 | 13.7  |
| ring-C(C(CH <sub>2</sub> ) <sub>2</sub> ) <sub>2</sub> | -94.70  | -17.06 | -16.39 | 95.40  | 73.9 | 13.3 | 12.8  |

|                      |         |        |        |        |      |      |      |
|----------------------|---------|--------|--------|--------|------|------|------|
| $C(CH=CH=CH=CH_2)_2$ | -108.24 | -22.55 | -18.28 | 108.91 | 72.6 | 15.1 | 12.3 |
| $C(C_6H_5)_2$        | -89.78  | -18.19 | -18.03 | 93.39  | 71.3 | 14.4 | 14.3 |
| $C(CH_2)_2$          | -7.23   | -1.61  | -4.48  | 8.64   | 54.3 | 12.1 | 33.6 |
| $C(CH=CH=CH_2)_2$    | -7.07   | -2.09  | -4.48  | 9.56   | 51.8 | 15.3 | 32.8 |
| dative C(0)          |         |        |        |        |      |      |      |
| $C(OH_2)_2$          | -173.16 | -27.08 | -17.07 | 153.78 | 79.7 | 12.5 | 7.9  |
| $C(NH_3)_2$          | -192.76 | -36.29 | -20.29 | 165.33 | 77.3 | 14.6 | 8.1  |
| $C(SeH_2)_2$         | -43.12  | -8.81  | -10.78 | 40.14  | 68.8 | 14.1 | 17.2 |
| $C(PH_3)_2$          | -41.10  | -8.63  | -10.75 | 39.25  | 68.0 | 14.3 | 17.8 |

### Cartesian coordinates of complexes with ICN

#### OH<sub>2</sub>

|    |              |              |              |
|----|--------------|--------------|--------------|
| 8  | 2.910525000  | 0.000083000  | -0.016919000 |
| 1  | 3.470832000  | 0.770070000  | 0.111418000  |
| 1  | 3.470557000  | -0.770112000 | 0.111415000  |
| 6  | -1.945992000 | -0.000029000 | 0.006558000  |
| 7  | -3.094741000 | 0.000104000  | 0.013382000  |
| 53 | 0.058746000  | -0.000022000 | -0.004160000 |

#### NH<sub>3</sub>

|    |              |              |              |
|----|--------------|--------------|--------------|
| 7  | 2.929367000  | 0.000121000  | 0.000335000  |
| 1  | 3.294392000  | -0.536516000 | 0.778578000  |
| 1  | 3.299327000  | -0.405494000 | -0.851476000 |
| 1  | 3.297725000  | 0.941025000  | 0.076992000  |
| 6  | -1.961678000 | 0.000460000  | 0.000051000  |
| 7  | -3.110669000 | -0.000235000 | 0.000694000  |
| 53 | 0.059391000  | -0.000018000 | -0.000219000 |

#### CH<sub>4</sub>

|    |              |              |              |
|----|--------------|--------------|--------------|
| 6  | -1.992028000 | 0.007832000  | -0.000209000 |
| 7  | -3.140320000 | 0.015573000  | -0.000619000 |
| 53 | 0.000946000  | -0.005374000 | 0.000195000  |
| 6  | 3.385213000  | 0.012984000  | -0.000480000 |
| 1  | 3.015197000  | -1.009662000 | -0.062732000 |
| 1  | 3.044235000  | 0.587508000  | -0.860571000 |
| 1  | 4.472558000  | -0.007253000 | 0.000348000  |
| 1  | 3.041028000  | 0.480341000  | 0.921069000  |

#### H<sub>2</sub>C=CH<sub>2</sub>

|    |             |              |              |
|----|-------------|--------------|--------------|
| 6  | 2.221900000 | 0.000081000  | 0.000422000  |
| 7  | 3.370444000 | -0.000112000 | 0.001005000  |
| 53 | 0.216460000 | 0.000008000  | -0.000328000 |

|   |              |              |              |
|---|--------------|--------------|--------------|
| 6 | -3.023297000 | -0.663003000 | 0.000485000  |
| 6 | -3.023220000 | 0.662982000  | 0.000485000  |
| 1 | -3.029317000 | -1.230373000 | -0.922334000 |
| 1 | -3.029943000 | -1.230221000 | 0.923399000  |
| 1 | -3.028552000 | 1.230297000  | -0.922386000 |
| 1 | -3.030000000 | 1.230324000  | 0.923319000  |

HC≡CH

|    |              |              |              |
|----|--------------|--------------|--------------|
| 6  | 2.145025000  | 0.000299000  | -0.000680000 |
| 7  | 3.293543000  | 0.000710000  | -0.001447000 |
| 53 | 0.142658000  | -0.000453000 | 0.000501000  |
| 6  | -3.101929000 | 0.599328000  | -0.000884000 |
| 6  | -3.106278000 | -0.596881000 | -0.000870000 |
| 1  | -3.124668000 | -1.661887000 | -0.000931000 |
| 1  | -3.111932000 | 1.664450000  | -0.000880000 |

C(OH)<sub>2</sub> t

|    |              |              |              |
|----|--------------|--------------|--------------|
| 6  | -2.360326000 | -0.000323000 | 0.000039000  |
| 8  | -3.060740000 | -1.098015000 | 0.000264000  |
| 1  | -4.033651000 | -0.980236000 | 0.000508000  |
| 8  | -3.057050000 | 1.099743000  | 0.000176000  |
| 1  | -4.030352000 | 0.985252000  | 0.000445000  |
| 6  | 2.586301000  | 0.000490000  | -0.000078000 |
| 7  | 3.735505000  | 0.001155000  | -0.000078000 |
| 53 | 0.556640000  | -0.000527000 | -0.000070000 |

C(OH)<sub>2</sub> c

|    |              |              |              |
|----|--------------|--------------|--------------|
| 6  | 2.305513000  | -0.000044000 | 0.000061000  |
| 8  | 3.082666000  | -1.047690000 | 0.000143000  |
| 1  | 2.530652000  | -1.839137000 | 0.000106000  |
| 8  | 3.079767000  | 1.049749000  | 0.000147000  |
| 1  | 2.525566000  | 1.839677000  | 0.000085000  |
| 6  | -2.556276000 | 0.000420000  | 0.000006000  |
| 7  | -3.705446000 | 0.000947000  | 0.000440000  |
| 53 | -0.507792000 | -0.000489000 | -0.000113000 |

C(NH<sub>2</sub>)<sub>2</sub>

|   |              |             |              |
|---|--------------|-------------|--------------|
| 6 | -1.981629000 | 0.000016000 | -0.466044000 |
| 7 | -2.306719000 | 1.188531000 | 0.442824000  |
| 1 | -3.299774000 | 1.312553000 | 0.653751000  |

|    |              |              |              |
|----|--------------|--------------|--------------|
| 1  | -1.756910000 | 1.238721000  | 1.323904000  |
| 1  | -2.019155000 | 1.998773000  | -0.106895000 |
| 7  | -2.306527000 | -1.188659000 | 0.442773000  |
| 1  | -2.019100000 | -1.998729000 | -0.107253000 |
| 1  | -1.756576000 | -1.238929000 | 1.323718000  |
| 1  | -3.299552000 | -1.312688000 | 0.653799000  |
| 6  | 2.622180000  | 0.000215000  | 0.295020000  |
| 7  | 3.722673000  | -0.000147000 | 0.646390000  |
| 53 | 0.312109000  | 0.000016000  | -0.253562000 |

NHC

|    |              |              |              |
|----|--------------|--------------|--------------|
| 7  | 2.449607000  | -1.049942000 | -0.000110000 |
| 6  | 1.605440000  | -0.000201000 | -0.000044000 |
| 6  | 3.779635000  | -0.673705000 | -0.000030000 |
| 6  | 3.779301000  | 0.674362000  | -0.000198000 |
| 7  | 2.449101000  | 1.049951000  | 0.000007000  |
| 1  | 2.122279000  | -2.001563000 | -0.000199000 |
| 1  | 2.121273000  | 2.001403000  | -0.000129000 |
| 1  | 4.590796000  | 1.378855000  | -0.000168000 |
| 1  | 4.591471000  | -1.377806000 | 0.000063000  |
| 6  | -3.115859000 | 0.000170000  | 0.000149000  |
| 7  | -4.266169000 | 0.000493000  | -0.000583000 |
| 53 | -1.021598000 | -0.000154000 | 0.000113000  |

C(C<sub>2</sub>H<sub>5</sub>)<sub>2</sub>

|   |             |              |              |
|---|-------------|--------------|--------------|
| 6 | 2.492477000 | 1.216406000  | 0.217633000  |
| 1 | 3.515096000 | 1.139684000  | -0.175437000 |
| 6 | 1.835466000 | 2.552695000  | -0.100857000 |
| 1 | 1.630572000 | 2.630879000  | -1.168205000 |
| 1 | 0.891822000 | 2.661280000  | 0.430182000  |
| 1 | 2.613203000 | 1.115862000  | 1.317803000  |
| 1 | 2.492448000 | 3.373961000  | 0.181462000  |
| 6 | 1.836175000 | -2.552569000 | 0.100399000  |
| 1 | 1.630941000 | -2.631401000 | 1.167635000  |
| 1 | 0.892717000 | -2.660991000 | -0.431008000 |
| 6 | 2.492983000 | -1.215974000 | -0.217069000 |
| 1 | 3.515315000 | -1.139006000 | 0.176715000  |
| 1 | 2.614552000 | -1.114862000 | -1.317125000 |
| 1 | 2.493366000 | -3.373580000 | -0.182169000 |
| 6 | 1.712217000 | 0.000056000  | 0.000120000  |

|    |              |              |              |
|----|--------------|--------------|--------------|
| 6  | -2.906403000 | -0.000148000 | 0.000089000  |
| 7  | -4.057893000 | -0.000130000 | 0.000218000  |
| 53 | -0.729477000 | -0.000070000 | -0.000062000 |

C(C<sub>6</sub>H<sub>11</sub>)<sub>2</sub>

|   |              |              |              |
|---|--------------|--------------|--------------|
| 6 | 0.296802000  | 4.288609000  | 0.022861000  |
| 6 | 0.480950000  | 3.588754000  | 1.366753000  |
| 6 | 0.040778000  | 2.130645000  | 1.288429000  |
| 6 | 0.828117000  | 1.388525000  | 0.201653000  |
| 6 | 0.591207000  | 2.086486000  | -1.180594000 |
| 6 | 1.031019000  | 3.547395000  | -1.090490000 |
| 1 | 0.648232000  | 5.319991000  | 0.079203000  |
| 1 | -0.770372000 | 4.328152000  | -0.217274000 |
| 1 | -0.087029000 | 4.102865000  | 2.143312000  |
| 1 | 1.534888000  | 3.637642000  | 1.661127000  |
| 1 | 0.184947000  | 1.629491000  | 2.247904000  |
| 1 | -1.025270000 | 2.073544000  | 1.056021000  |
| 1 | 1.902122000  | 1.466025000  | 0.413738000  |
| 1 | 1.138185000  | 1.570596000  | -1.970823000 |
| 1 | -0.473053000 | 2.027161000  | -1.419597000 |
| 1 | 0.847847000  | 4.027497000  | -2.053541000 |
| 1 | 2.109936000  | 3.589237000  | -0.912108000 |
| 6 | 1.396684000  | -1.020438000 | -0.319915000 |
| 6 | 1.736349000  | -1.469303000 | 1.151180000  |
| 6 | 2.698717000  | -2.655689000 | 1.106810000  |
| 6 | 3.966628000  | -2.329219000 | 0.325924000  |
| 6 | 3.634160000  | -1.869738000 | -1.090087000 |
| 6 | 2.685656000  | -0.673391000 | -1.074531000 |
| 1 | 0.915769000  | -1.882762000 | -0.793075000 |
| 1 | 0.823234000  | -1.736305000 | 1.683495000  |
| 1 | 2.202884000  | -0.631652000 | 1.678101000  |
| 1 | 2.942006000  | -2.942501000 | 2.131566000  |
| 1 | 2.191059000  | -3.508427000 | 0.647741000  |
| 1 | 4.622225000  | -3.200780000 | 0.297367000  |
| 1 | 4.515726000  | -1.535752000 | 0.844029000  |
| 1 | 4.545204000  | -1.608985000 | -1.630741000 |
| 1 | 3.165538000  | -2.693239000 | -1.638144000 |
| 1 | 2.438329000  | -0.379864000 | -2.096127000 |
| 1 | 3.187022000  | 0.176740000  | -0.604248000 |
| 6 | 0.402216000  | 0.012526000  | -0.043974000 |

|    |              |              |              |
|----|--------------|--------------|--------------|
| 6  | -3.957696000 | -1.386091000 | -0.155897000 |
| 7  | -5.048680000 | -1.755023000 | -0.206018000 |
| 53 | -1.834117000 | -0.667508000 | -0.059519000 |

C(CH=CH<sub>2</sub>)<sub>2</sub>

|    |              |              |              |
|----|--------------|--------------|--------------|
| 1  | -2.578929000 | -3.327921000 | 0.000643000  |
| 6  | -2.005958000 | -2.408239000 | 0.000541000  |
| 1  | -3.695370000 | -1.156854000 | -0.000870000 |
| 1  | -0.925711000 | -2.486627000 | 0.001107000  |
| 6  | -2.606002000 | -1.206262000 | -0.000298000 |
| 6  | -1.828644000 | 0.000072000  | -0.000221000 |
| 6  | -2.605323000 | 1.206869000  | -0.000385000 |
| 1  | -3.694725000 | 1.157997000  | -0.000978000 |
| 6  | -2.004877000 | 2.408633000  | 0.000550000  |
| 1  | -0.924620000 | 2.486795000  | 0.001131000  |
| 1  | -2.577651000 | 3.328436000  | 0.000813000  |
| 6  | 2.834510000  | -0.000095000 | -0.000009000 |
| 7  | 3.985789000  | -0.000031000 | 0.000051000  |
| 53 | 0.675363000  | -0.000141000 | -0.000062000 |

ring-C(C(CH<sub>2</sub>)<sub>2</sub>)<sub>2</sub>

|    |              |              |              |
|----|--------------|--------------|--------------|
| 1  | -2.238226000 | -3.263138000 | -0.099086000 |
| 1  | -4.202547000 | -1.354386000 | -0.397407000 |
| 6  | -1.590360000 | -2.394078000 | -0.073506000 |
| 6  | -3.532667000 | -0.741510000 | 0.203370000  |
| 1  | -0.523555000 | -2.552974000 | -0.172398000 |
| 1  | -3.832653000 | -0.851140000 | 1.247700000  |
| 6  | -2.077497000 | -1.149712000 | 0.056091000  |
| 6  | -1.206356000 | -0.000168000 | 0.000012000  |
| 6  | -2.077016000 | 1.149771000  | -0.056096000 |
| 6  | -3.532383000 | 0.742118000  | -0.203215000 |
| 6  | -1.589608000 | 2.394045000  | 0.073187000  |
| 1  | -3.832439000 | 0.851815000  | -1.247521000 |
| 1  | -0.522783000 | 2.552862000  | 0.171964000  |
| 1  | -4.201968000 | 1.355282000  | 0.397597000  |
| 1  | -2.237374000 | 3.263189000  | 0.098521000  |
| 6  | 3.393165000  | 0.000048000  | -0.000033000 |
| 7  | 4.545246000  | 0.000080000  | -0.000050000 |
| 53 | 1.189644000  | -0.000097000 | 0.000040000  |

C(CH=CH=CH=CH<sub>2</sub>)<sub>2</sub>

|    |              |              |              |
|----|--------------|--------------|--------------|
| 6  | -1.792734000 | -0.957244000 | 0.357387000  |
| 6  | -3.104944000 | -0.842186000 | 0.033135000  |
| 1  | -1.406856000 | -1.945680000 | 0.593271000  |
| 1  | -3.504739000 | 0.121852000  | -0.267745000 |
| 6  | -4.018358000 | -1.958161000 | -0.009791000 |
| 6  | -5.294730000 | -1.821057000 | -0.373700000 |
| 1  | -3.629512000 | -2.929260000 | 0.276958000  |
| 1  | -5.691387000 | -0.857056000 | -0.670183000 |
| 1  | -5.975636000 | -2.661199000 | -0.385144000 |
| 6  | -1.265866000 | 1.447052000  | 0.291904000  |
| 6  | -0.405428000 | 2.460317000  | 0.011410000  |
| 1  | -2.278987000 | 1.704058000  | 0.602845000  |
| 1  | 0.613140000  | 2.210168000  | -0.270896000 |
| 6  | -0.752836000 | 3.856553000  | 0.062460000  |
| 6  | 0.137554000  | 4.807504000  | -0.230525000 |
| 1  | -1.765542000 | 4.117444000  | 0.350165000  |
| 1  | 1.150727000  | 4.551885000  | -0.517697000 |
| 1  | -0.117665000 | 5.857946000  | -0.190674000 |
| 6  | -0.846151000 | 0.095899000  | 0.208643000  |
| 6  | 3.502266000  | -1.346950000 | -0.090211000 |
| 7  | 4.595307000  | -1.711185000 | -0.131445000 |
| 53 | 1.386541000  | -0.615891000 | -0.003114000 |

C(C<sub>6</sub>H<sub>5</sub>)<sub>2</sub>

|   |              |              |              |
|---|--------------|--------------|--------------|
| 6 | -2.555862000 | 3.701274000  | -0.145804000 |
| 6 | -1.337053000 | 3.598082000  | 0.517627000  |
| 6 | -3.121089000 | 2.589776000  | -0.761691000 |
| 1 | -0.901220000 | 4.468380000  | 0.989354000  |
| 1 | -4.056987000 | 2.683377000  | -1.296201000 |
| 6 | -0.669868000 | 2.390002000  | 0.548679000  |
| 6 | -2.486882000 | 1.364885000  | -0.686320000 |
| 1 | 0.289644000  | 2.304017000  | 1.040318000  |
| 1 | -2.914452000 | 0.500325000  | -1.176800000 |
| 6 | -1.244423000 | 1.238954000  | -0.027882000 |
| 6 | -0.526379000 | -0.000032000 | -0.000037000 |
| 1 | -3.061988000 | 4.657038000  | -0.194143000 |
| 6 | -1.244762000 | -1.238840000 | 0.028068000  |
| 6 | -2.486769000 | -1.364867000 | 0.687223000  |
| 6 | -0.670544000 | -2.389618000 | -0.549334000 |

|    |              |              |              |
|----|--------------|--------------|--------------|
| 1  | -2.913942000 | -0.500460000 | 1.178313000  |
| 1  | 0.288887000  | -2.303394000 | -1.041111000 |
| 6  | -3.121071000 | -2.589748000 | 0.762313000  |
| 6  | -1.337872000 | -3.597628000 | -0.518598000 |
| 1  | -4.056609000 | -2.683593000 | 1.297409000  |
| 1  | -0.902451000 | -4.467771000 | -0.990986000 |
| 6  | -2.556347000 | -3.700946000 | 0.145450000  |
| 1  | -3.062587000 | -4.656664000 | 0.193564000  |
| 6  | 4.088266000  | -0.000064000 | 0.000183000  |
| 7  | 5.240305000  | -0.000779000 | 0.000112000  |
| 53 | 1.891198000  | -0.000060000 | 0.000004000  |

C(CH<sub>2</sub>)<sub>2</sub>

|    |              |              |              |
|----|--------------|--------------|--------------|
| 6  | -3.042757000 | 1.414265000  | 0.000016000  |
| 1  | -4.043290000 | 1.828516000  | 0.000591000  |
| 6  | -2.856675000 | 0.129343000  | 0.000180000  |
| 1  | -2.205192000 | 2.101369000  | -0.000566000 |
| 6  | -2.668000000 | -1.160661000 | 0.000368000  |
| 1  | -2.601874000 | -1.713941000 | 0.929755000  |
| 1  | -2.602603000 | -1.714396000 | -0.928798000 |
| 6  | 2.408698000  | 0.261449000  | 0.000224000  |
| 7  | 3.532829000  | 0.496932000  | 0.000534000  |
| 53 | 0.446709000  | -0.148046000 | -0.000178000 |

C(CH=CH=CH<sub>2</sub>)<sub>2</sub>

|   |              |              |              |
|---|--------------|--------------|--------------|
| 6 | -1.468409000 | -2.293505000 | 0.187453000  |
| 6 | -1.421612000 | -2.342644000 | -1.138779000 |
| 1 | -1.379494000 | -3.208008000 | 0.762216000  |
| 1 | -1.307056000 | -3.283309000 | -1.658866000 |
| 1 | -1.496462000 | -1.443324000 | -1.740341000 |
| 6 | -1.627884000 | -1.060976000 | 0.983278000  |
| 1 | -1.528255000 | -1.149416000 | 2.061831000  |
| 6 | -3.583626000 | 1.760658000  | -0.235438000 |
| 6 | -4.649569000 | 0.973750000  | -0.311310000 |
| 1 | -3.694667000 | 2.832673000  | -0.351471000 |
| 1 | -5.637745000 | 1.384576000  | -0.465170000 |
| 1 | -4.561229000 | -0.103318000 | -0.225724000 |
| 6 | -2.205740000 | 1.285711000  | -0.014387000 |
| 1 | -1.395507000 | 1.959691000  | -0.280899000 |
| 6 | -1.899217000 | 0.119725000  | 0.485291000  |
| 6 | 3.246486000  | 0.559023000  | -0.316581000 |

|    |             |             |              |
|----|-------------|-------------|--------------|
| 7  | 4.324690000 | 0.848350000 | -0.586993000 |
| 53 | 1.365755000 | 0.057765000 | 0.154155000  |

C(OH<sub>2</sub>)<sub>2</sub>

|    |              |              |              |
|----|--------------|--------------|--------------|
| 6  | -1.995162000 | -0.000348000 | -0.530737000 |
| 8  | -2.320384000 | -1.193016000 | 0.535082000  |
| 1  | -1.488941000 | -1.625561000 | 0.823978000  |
| 1  | -2.900714000 | -1.824609000 | 0.088654000  |
| 8  | -2.321043000 | 1.194214000  | 0.533788000  |
| 1  | -2.898978000 | 1.826596000  | 0.085408000  |
| 1  | -1.489835000 | 1.625714000  | 0.824703000  |
| 6  | 2.572036000  | 0.000452000  | 0.295880000  |
| 7  | 3.678078000  | 0.001086000  | 0.624882000  |
| 53 | 0.315134000  | -0.000376000 | -0.251674000 |

C(NH<sub>3</sub>)<sub>2</sub>

|    |              |              |              |
|----|--------------|--------------|--------------|
| 6  | -1.981629000 | 0.000016000  | -0.466044000 |
| 7  | -2.306719000 | 1.188531000  | 0.442824000  |
| 1  | -3.299774000 | 1.312553000  | 0.653751000  |
| 1  | -1.756910000 | 1.238721000  | 1.323904000  |
| 1  | -2.019155000 | 1.998773000  | -0.106895000 |
| 7  | -2.306527000 | -1.188659000 | 0.442773000  |
| 1  | -2.019100000 | -1.998729000 | -0.107253000 |
| 1  | -1.756576000 | -1.238929000 | 1.323718000  |
| 1  | -3.299552000 | -1.312688000 | 0.653799000  |
| 6  | 2.622180000  | 0.000215000  | 0.295020000  |
| 7  | 3.722673000  | -0.000147000 | 0.646390000  |
| 53 | 0.312109000  | 0.000016000  | -0.253562000 |

C(SeH<sub>2</sub>)<sub>2</sub>

|    |              |              |              |
|----|--------------|--------------|--------------|
| 6  | 0.954199000  | -0.000028000 | -0.251180000 |
| 34 | 1.911432000  | 1.538786000  | 0.019062000  |
| 1  | 2.707663000  | 1.414815000  | 1.299370000  |
| 1  | 3.215847000  | 1.413720000  | -0.728003000 |
| 34 | 1.911528000  | -1.538762000 | 0.019061000  |
| 1  | 3.215990000  | -1.413605000 | -0.727939000 |
| 1  | 2.707771000  | -1.414707000 | 1.299350000  |
| 6  | -3.777386000 | -0.000027000 | 0.089628000  |
| 7  | -4.924752000 | -0.000062000 | 0.171749000  |
| 53 | -1.705953000 | -0.000006000 | -0.050413000 |

C(PH<sub>3</sub>)<sub>2</sub>

|    |              |              |              |
|----|--------------|--------------|--------------|
| 6  | -1.716966000 | 0.000031000  | -0.033281000 |
| 15 | -2.422286000 | -1.484365000 | 0.000514000  |
| 1  | -3.047981000 | -1.958827000 | 1.175542000  |
| 1  | -3.426753000 | -1.814798000 | -0.936327000 |
| 1  | -1.494918000 | -2.509606000 | -0.224289000 |
| 15 | -2.422731000 | 1.484182000  | 0.000527000  |
| 1  | -1.494546000 | 2.509963000  | -0.218383000 |
| 1  | -3.423017000 | 1.816208000  | -0.940238000 |
| 1  | -3.053859000 | 1.956534000  | 1.173539000  |
| 6  | 3.041123000  | 0.000115000  | -0.006742000 |
| 7  | 4.191279000  | 0.000057000  | -0.012960000 |
| 53 | 0.968536000  | 0.000038000  | 0.005385000  |
